# Supplementary material for: Determination of Anti-Xa Inhibitor Plasma Concentrations Using a Universal Edoxaban Calibrator
Source: MDPI journal article supplement (doi:10.3390/diagnostics13122128), 2023-06-20
Supplement: s1 [file s1]

*Supplementary material*

Table S1: Intra- and inter-day (n=6) imprecision (CV) and inaccuracy (bias) for the different analytes (LC-MS/MS)

| Analyte     | Concentration (ng/mL) | Interday |          | Intraday |          |
|-------------|-----------------------|----------|----------|----------|----------|
|             |                       | CV (%)   | Bias (%) | CV (%)   | Bias (%) |
| Apixaban    | 40                    | 8.3      | 2.8      | 3.7      | 9.9      |
|             | 150                   | 5.6      | 6.9      | 5.6      | 9.0      |
|             | 300                   | 8.0      | 8.6      | 7.7      | 7.0      |
| Rivaroxaban | 40                    | 6.0      | 7.1      | 3.6      | 7.2      |
|             | 150                   | 4.4      | 6.1      | 5.1      | 5.9      |
|             | 300                   | 11.5     | 10.6     | 2.4      | 10.1     |
| Edoxaban    | 40                    | 5.9      | -9.6     | 4.7      | -8.9     |
|             | 150                   | 5.2      | -8.7     | 2.6      | -1.5     |
|             | 300                   | 9.2      | -3.5     | 6.6      | -5.5     |
| Edoxaban M4 | 40                    | 6.3      | -3.2     | 3.0      | 3.8      |
|             | 150                   | 6.6      | -2.9     | 4.1      | 10.8     |
|             | 300                   | 7.2      | 2.2      | 5.9      | 6.8      |
